# Supplementary material for: Efficacy and safety of low-molecular-weight-heparin plus citrate in nephrotic syndrome during continuous kidney replacement therapy: retrospective study
Source: PeerJ journal article supplement (doi:10.7717/peerj.18919), 2025-02-25

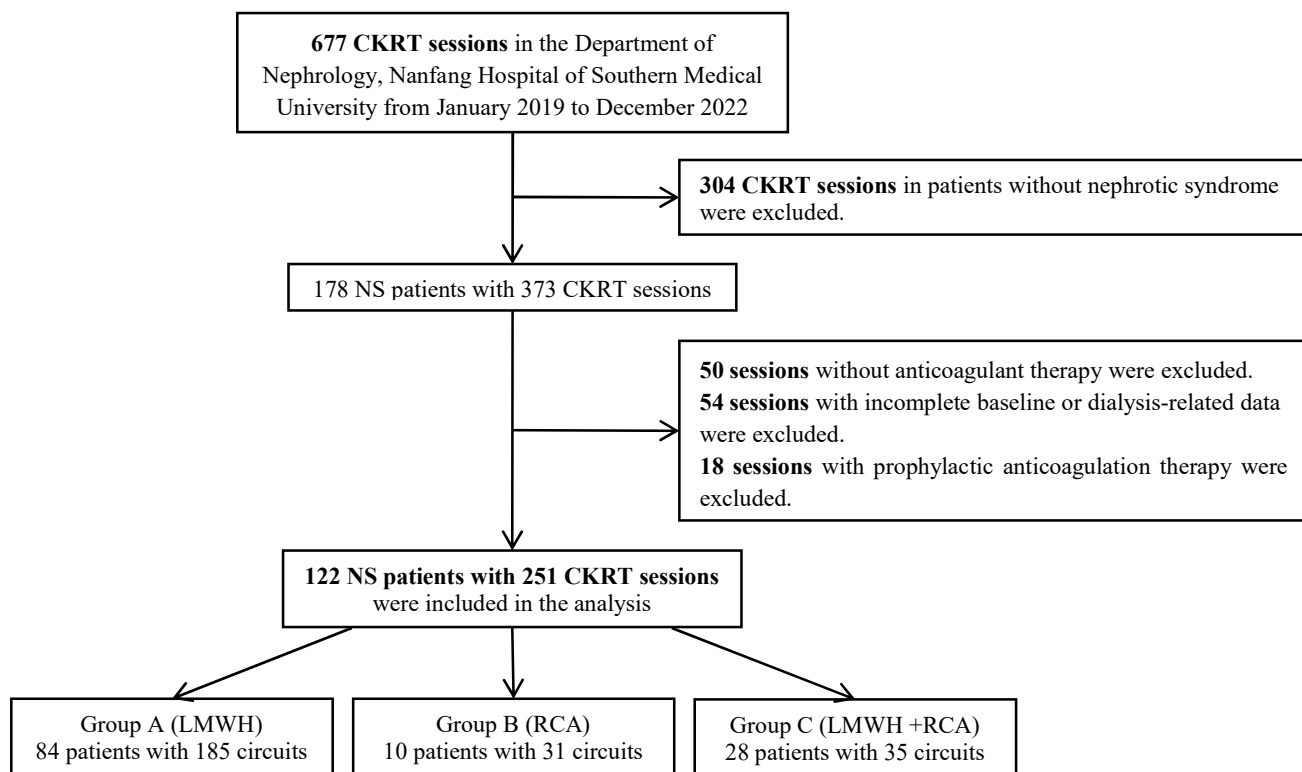

Supplement: Figure_S1.pdf [file Figure_S1.pdf]
